# Supplementary material
Source: PubMed Central journal article supplement (PMC8757307)
Supplement: ocab258_supplementary_files.pdf [file ocab258_supplementary_files.pdf]

# Supplemental Figures and Tables for:

Meeker JR, Burris H, Bai R, Levine LD, Boland MR.

Neighborhood deprivation increases the risk of post-induction cesarean delivery

## Table of Contents

### *Tables*

|                                                                                                                                                                                                 |   |
|-------------------------------------------------------------------------------------------------------------------------------------------------------------------------------------------------|---|
| Appendix 1. ICD-9 and ICD-10 codes used to identify labor induction from the EHR.....                                                                                                           | 1 |
| Appendix 2. Sensitivity analysis for associations between neighborhood deprivation and cesarean delivery following labor induction + residential mobility.....                                  | 2 |
| Appendix 3: Adjusted odds ratios and their 95% confidence intervals for various regression models of the association between neighborhood deprivation and post-induction cesarean delivery..... | 3 |

**Appendix 1. ICD-9 and ICD-10 codes used to identify labor induction from the EHR**

| <b>CODE</b> | <b>ICD-9 or ICD-10</b> | <b>DESCRIPTION</b>                                                                                                  |
|-------------|------------------------|---------------------------------------------------------------------------------------------------------------------|
| 73.01       | ICD-9                  | Induction of labor by artificial rupture of membranes                                                               |
| 73.1        | ICD-9                  | Surgical induction of labor                                                                                         |
| 73.4        | ICD-9                  | Medical induction of labor                                                                                          |
| 10907ZC     | ICD-10                 | Artificial rupture of membranes (not in augmentation)                                                               |
| 0U7C7DZ     | ICD-10                 | Dilation of cervix with intraluminal device, via natural or artificial opening (Foley balloon left in on discharge) |
| 0U7C7ZZ     | ICD-10                 | Dilation of Cervix, via natural or artificial opening (Foley balloon)                                               |
| 3E0P7GC     | ICD-10                 | Cervical ripener (cervidil, misoprostol etc...)                                                                     |
| 3E033VJ     | ICD-10                 | Oxytocin or Pitocin not used for hemorrhage or labor augmentation                                                   |

**Appendix 2. Sensitivity analysis for associations between neighborhood deprivation and cesarean delivery following labor induction + residential mobility**

| <b>Covariate</b>                                                                                                                    | <b>Crude OR</b> | <b>95% CI</b> | <b>Adjusted OR<sup>a</sup></b> | <b>95% CI</b> |
|-------------------------------------------------------------------------------------------------------------------------------------|-----------------|---------------|--------------------------------|---------------|
| <b>Neighborhood Deprivation</b>                                                                                                     |                 |               |                                |               |
| Highest (75-100)                                                                                                                    | 0.90            | 0.78-1.03     | 2.12                           | 1.51-2.96     |
| High (50-74)                                                                                                                        | 1.07            | 0.91-1.26     | 2.24                           | 1.59-3.15     |
| Moderate (25-49)                                                                                                                    | 0.91            | 0.77-1.06     | 1.20                           | 0.87-1.67     |
| Lowest (0-24)                                                                                                                       | 1.00            | Reference     | 1.00                           | Reference     |
| <b>Comorbidities</b>                                                                                                                |                 |               |                                |               |
| Diabetes (versus no diabetes)                                                                                                       | 1.30            | 1.03-1.58     | 0.94                           | 0.65-1.37     |
| Pregnancy-related hypertension (versus not)                                                                                         | 1.59            | 1.41-1.80     | 1.24                           | 0.98-1.57     |
| Obesity (versus not obese)                                                                                                          | 1.76            | 1.58-1.97     | 2.14                           | 1.75-2.60     |
| Residential Mobility (moved versus no)                                                                                              | 1.13            | 0.96-1.33     | 1.12                           | 0.93-1.33     |
| <b><sup>a</sup>Additionally adjusted for maternal age (continuous), race/ethnicity, parity, gestational age, and marital status</b> |                 |               |                                |               |

**Appendix 3: Adjusted\* odds ratios and their 95% confidence intervals for various regression models of the association between neighborhood deprivation and post-induction cesarean delivery**

| <b>Model</b>                                                                                                                                      | <b>Level of Neighborhood Deprivation</b> | <b>aOR</b> | <b>95% CI</b> |
|---------------------------------------------------------------------------------------------------------------------------------------------------|------------------------------------------|------------|---------------|
| Model 1: generalized linear mixed model, categorical neighborhood deprivation levels and post-induction cesarean delivery                         | Highest                                  | 1.29       | 1.05-1.57     |
|                                                                                                                                                   | High                                     | 1.28       | 1.04-1.57     |
|                                                                                                                                                   | Moderate                                 | 1.20       | 1.00-1.44     |
|                                                                                                                                                   | Lowest                                   | 1.00       | Reference     |
| Model 2: generalized linear mixed model, association between neighborhood deprivation as a non-linear spline and post-induction cesarean delivery | Highest                                  | 1.21       | 1.10-1.34     |
|                                                                                                                                                   | High                                     | 1.14       | 1.11-1.18     |
|                                                                                                                                                   | Moderate                                 | 1.07       | 1.04-1.10     |
|                                                                                                                                                   | Lowest                                   | 1.00       | Reference     |
| Model 3: Model 1 + residential mobility on a subset for whom we had residential mobility data                                                     | Highest                                  | 2.12       | 1.51-2.96     |
|                                                                                                                                                   | High                                     | 2.24       | 1.59-3.15     |
|                                                                                                                                                   | Moderate                                 | 1.20       | 0.87-1.67     |
|                                                                                                                                                   | Lowest                                   | 1.00       | Reference     |
| *adjusted for obesity, pregnancy-related hypertension, diabetes, parity, gestational age, age, marital status, race/ethnicity                     |                                          |            |               |
